# Supplementary material for: Delayed Stormflow Generation in a Semi-humid Forested Watershed Controlled by Soil Water Storage and Groundwater
Source: Copernicus journal article supplement (doi:10.5194/egusphere-2024-2177), 2024-09-02
Supplement: Supplementary file [file egusphere-2024-2177-RC1-supplement.pdf]

Review of manuscript EGUSPHERE-2024-2177. Delayed Stormflow Generation in a Semi-humid Forested Watershed Controlled by Soil Water Storage and Groundwater.

### **Specific comments**

Introduction: I would suggest that the authors include information on where the source of bimodal response come from based on the literature. It is not clear in the introduction if this is from groundwater, deep soil layers or if it a delayed response from the headwater component of the watershed.

L70-71: This is a good point; however, you will need to explain why. Is it that most catchments only show a unimodal response or is it that when catchments show bimodal responses authors do not go into depth on these responses?

L78: Please include the full name of these acronyms (SWC, GWL) as it is the first time used in the main text..

L116: Please expand on this. What are the specific depths that soil moisture is being measured.

L158: Can you indicate why these three events were selected..

L162: Refer to Figure 3.

L168-170: Indicate the amount of rainfall in both the text and the figure.

L172: Recommend putting arrows on these figures to show the evolution of the events. Also, please indicate what the red circles indicate.

L173-174: Please indicate the depth of rainfall for these events.

Figure 7: Please indicate the rainfall depths for these events.

General analyses: In general, the analyses are quite good and I think good interpretations of the data have been presented. My one major concern which was not clear in the paper is if the analyses were based on the entire bimodal hydrograph or the second peak of the hydrograph. This needs to be made very clear in the manuscript. Additionally, it would be interesting to look at the threshold for the first peak and then compare it to the second peak. Furthermore, with the groundwater, and rainfall, it will be good to combine these with the soil moisture to provide a better estimation and explanation of the threshold e.g. Detty and McGuire 2010, Farrick and Branfireun 2014, Penna et al 2011.
